# Supplementary material for: Pheromone-based communication influences the production of somatic extracellular vesicles in C. elegans
Source: PubMed Central journal article supplement (PMC10978837; doi:10.1038/s41467-024-47016-x), 2024-03-28
Supplement: 41467_2024_47016_MOESM1_ESM.pdf [file 41467_2024_47016_MOESM1_ESM.pdf]

## Supplementary Information

### **Pheromone-based communication influences the production of somatic extracellular vesicles in *C. elegans***

Agata Szczepańska<sup>1#</sup>, Katarzyna Olek<sup>2#</sup>, Klaudia Kołodziejska<sup>1</sup>, Jingfang Yu<sup>3</sup>, Abdulrahman Tudu Ibrahim<sup>1,4</sup>, Laura Adamkiewicz<sup>1</sup>, Frank C. Schroeder<sup>3</sup>, Wojciech Pokrzywa<sup>2\*</sup>, Michał Turek<sup>1\*</sup>

#### **Affiliations:**

<sup>1</sup>*Laboratory of Animal Molecular Physiology, Institute of Biochemistry and Biophysics, Polish Academy of Sciences, Warsaw, Poland*

<sup>2</sup>*Laboratory of Protein Metabolism, International Institute of Molecular and Cell Biology in Warsaw, Poland.*

<sup>3</sup>*Boyce Thompson Institute and Department of Chemistry and Chemical Biology, Cornell University, Ithaca, NY 14853, USA*

<sup>4</sup>*Faculty of Chemistry, Warsaw University of Technology, Warsaw, Poland*

# These authors contributed equally

\* Co-corresponding authors

Correspondence should be directed to:

MT: [m.turek@ibb.waw.pl](mailto:m.turek@ibb.waw.pl)

WP: [wpokrzywa@iimcb.gov.pl](mailto:wpokrzywa@iimcb.gov.pl)

The **Supplementary Information** contains 7 figures, 2 tables, 3 spreadsheets, and a reporting summary.

### Supplementary Figures

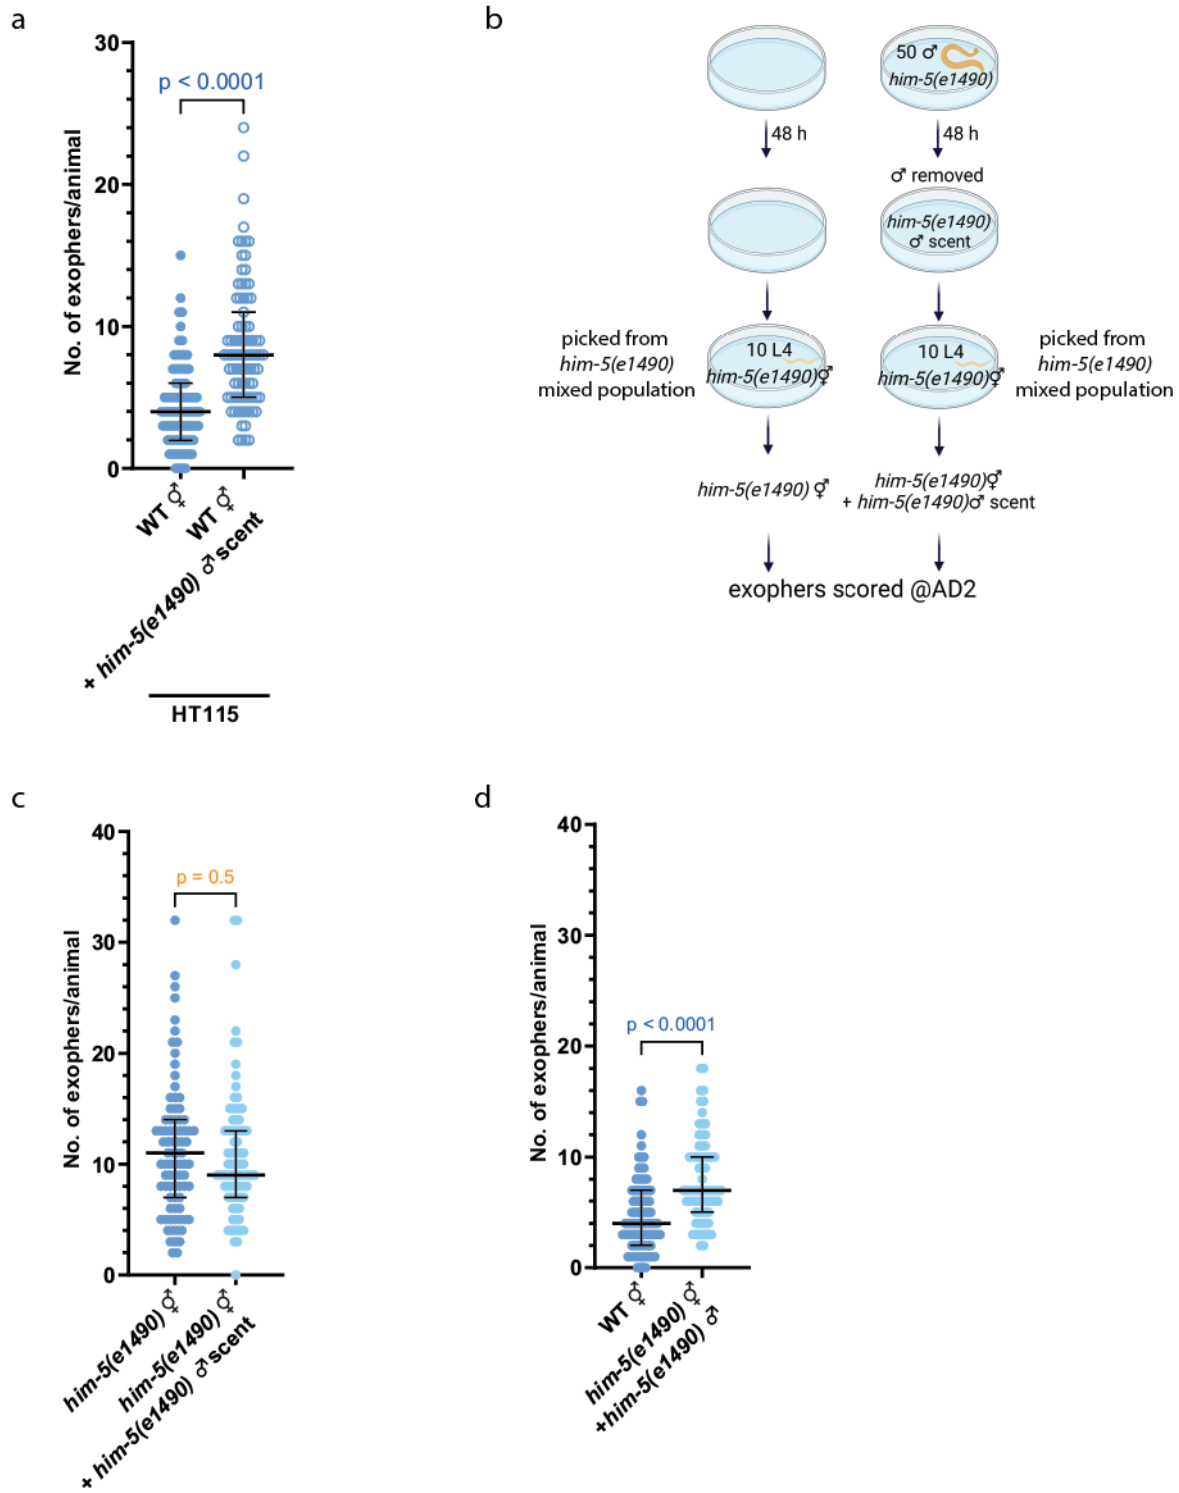

**Supplementary Figure 1. Exposing hermaphrodites to males or their scent throughout the entire duration of the experiment does not further elevate exopher production.**

**a** Growing hermaphrodites on male-conditioned plates increases exopherogenesis levels also when worms were grown on HT115 *E. coli* strain.  $n = 79$  and  $87$  worms (for respective columns),  $N = 3$  independent experiments.

**b** Schematic representation of the experimental setup for Supplementary Fig. 1c. Created with BioRender.com.

**c** Exposing hermaphrodites to male secretome after the L4 stage does not further increase exopher production.  $n = 83$  worms,  $N = 3$  independent experiments.

**d** Co-culturing *him-5* hermaphrodites with males increases exopherogenesis.  $n = 90$  and  $72$  worms (for respective columns),  $N = 3$  independent experiments.

Data information: Data are presented as median with interquartile range; not significant p values ( $p > 0.05$ ) are in orange color, significant p values ( $p < 0.05$ ) are in blue color; two-tailed Mann-Whitney test. Source data are provided as a Source Data file.

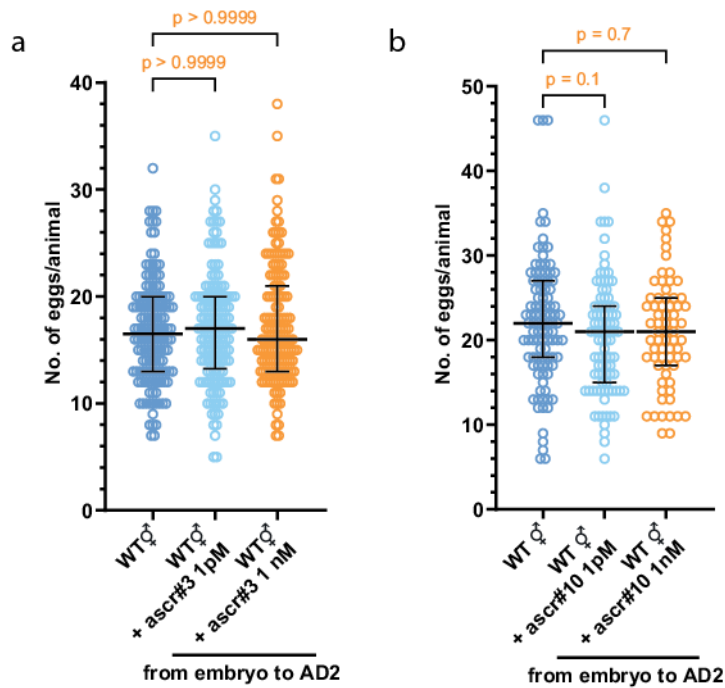

**Supplementary Figure 2. *ascr#3* and *ascr#10* do not influence embryo retention in hermaphrodites.**

**a** *ascr#3* does not affect embryo retention in hermaphrodites.  $n = 140$  worms,  $N = 5$  independent experiments.

**b** *ascr#10* does not affect embryo retention in hermaphrodites.  $n = 101, 93,$  and  $69$  worms (for respective columns),  $N = 4$  independent experiments.

Data information: Data are presented as median with interquartile range; not significant  $p$  values ( $p > 0.05$ ) are in orange color, Kruskal-Wallis test with Dunn's multiple comparisons test.

Source data are provided as a Source Data file.

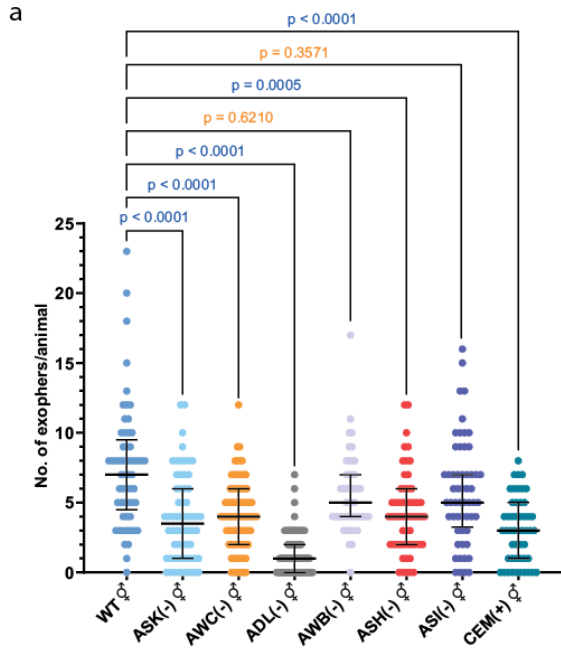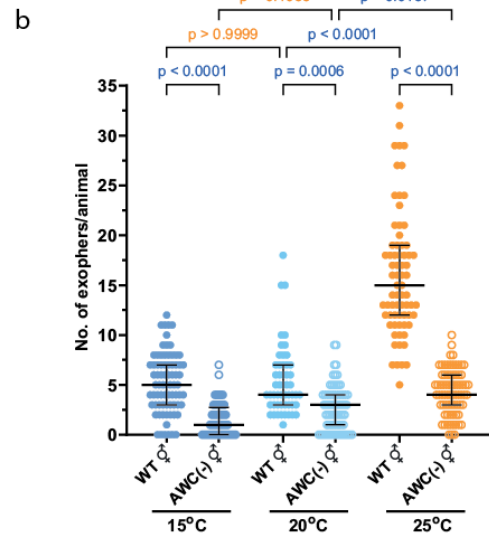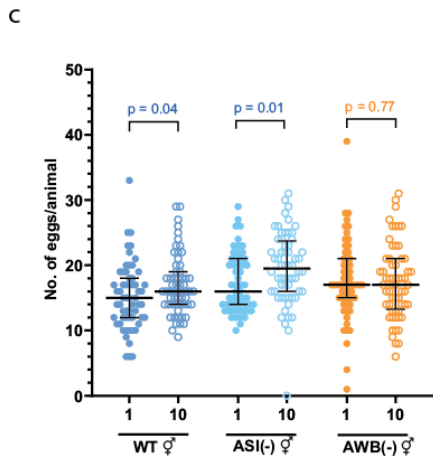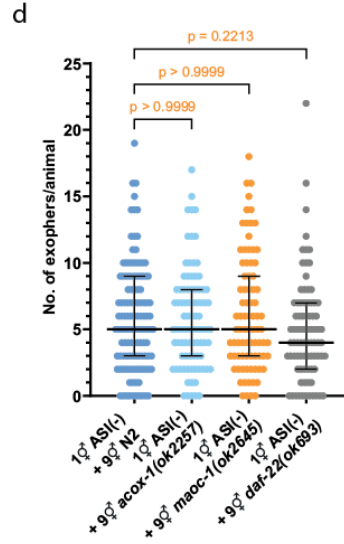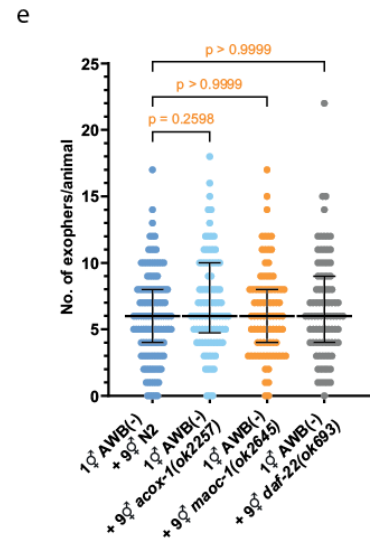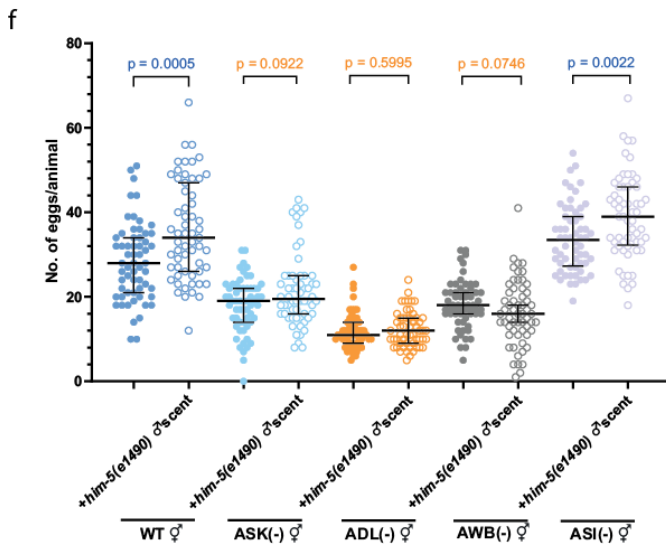

**Supplementary Figure 3. Influence of pheromones released by ascaroside biosynthesis mutants on hermaphrodites with genetically ablated sensory neurons.**

**a** Genetic ablation of ASK, AWC, ADL, or ASH neurons reduces exopher production in hermaphrodites grown as solitary animals. Solitary hermaphrodites with male-specific CEM neurons produce fewer exophers than wild-type worms. Data for solitary animals were extracted from Fig. 4e and presented separately to enhance accessibility of the statistical analysis. n = 57, 62, 84, 88, 49, 55, 56, and 50 worms (for respective columns), N = 3 independent experiments.

**b** AWC neurons regulate the temperature-dependent increase in muscle exopher production. n = 71, 73, 52, 74, 75, and 92 worms (for respective columns), N = 3 independent experiments.

**c** *In utero* embryo number for wild-type worms and ASI and AWB ablation mutants grown as solitary animals or in ten-hermaphrodite population. n = 60, 60, 55, 60, 60, and 60 worms (for respective columns), N = 3 independent experiments.

**d - e** Worms with ablated ASI and AWB neurons grown together with ascaroside biosynthesis mutants do not exhibit alterations in produced exopher numbers. (d) n = 117, 87, 83, and 83 worms (for respective columns), (e) n = 120, 90, 87, and 90 worms (for respective columns), N = 3 independent experiments.

**f** Removal of ASK, AWB, or ADL neurons prevented the increase in the number of embryos *in utero* after exposing hermaphrodites to male pheromones. n = 60, 59, 60, 60, 60, 55, 60, 59, 60, and 60 worms (for respective columns), N = 3 independent experiments.

Data information: Data are presented as median with interquartile range; n represents the number of worms; (a - b, d -e) Kruskal-Wallis test with Dunn's multiple comparisons test, (c, f) two-tailed Mann-Whitney test. Source data are provided as a Source Data file.

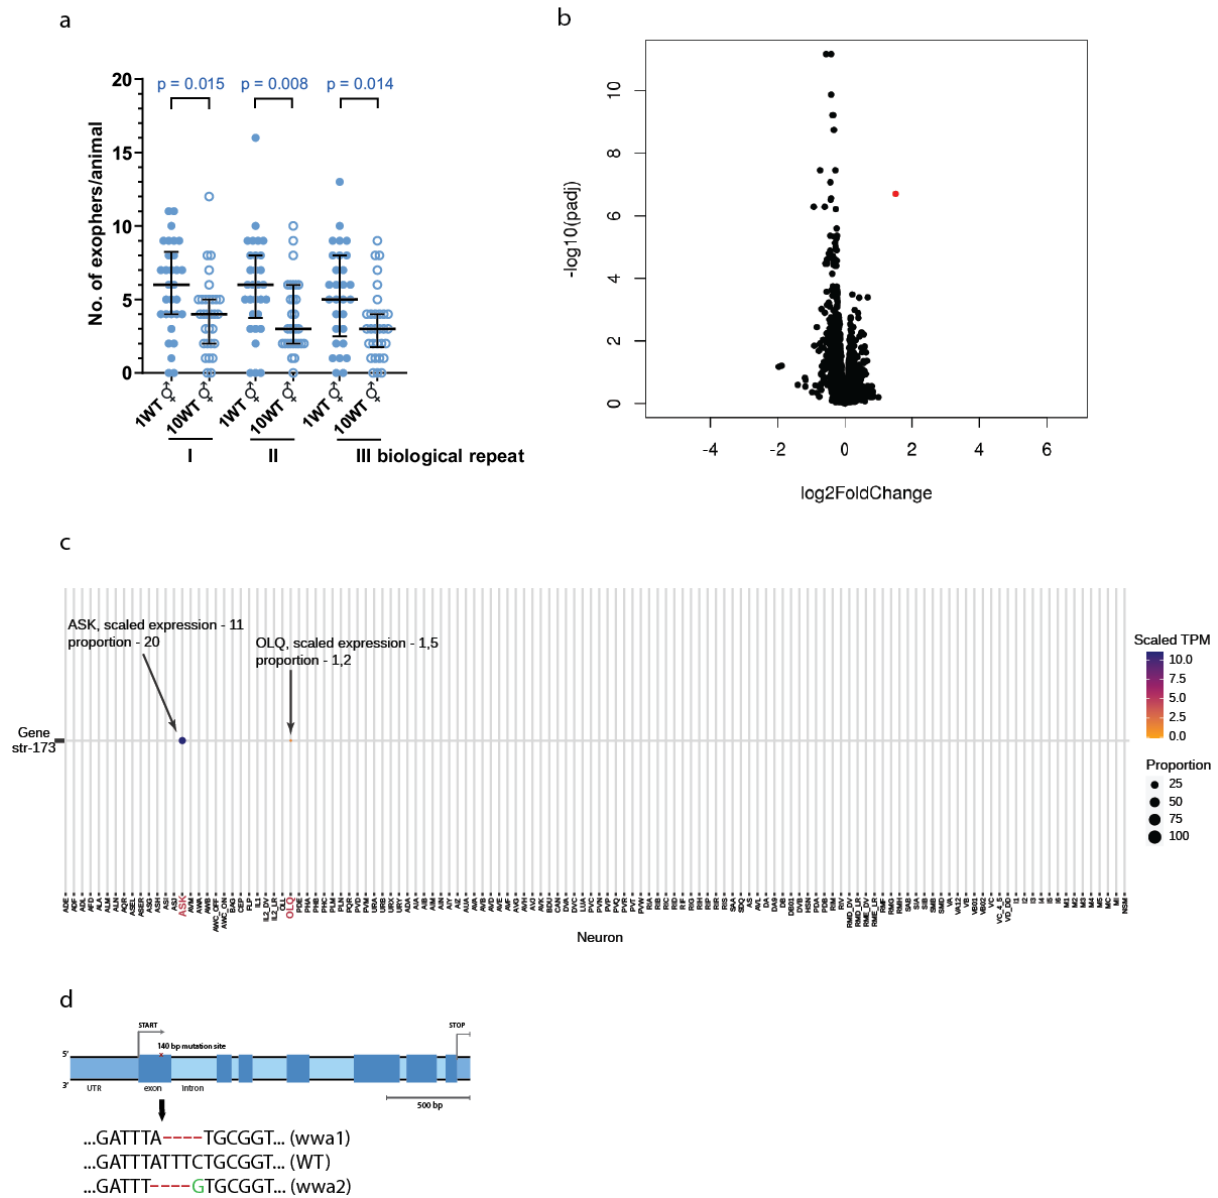

**Supplementary Figure 4. Comparison of transcriptomes of worms grown at different population densities.**

**a** Number of exophers produced by worms that were used for RNAseq analysis.  $n = 30, 30, 30, 30, 29,$  and  $30$  worms (for respective columns),  $N = 3$  independent experiments.

**b** Transcriptomes of worms grown as single animals or at a density of ten hermaphrodites per plate did not differ dramatically. One transcript with a highly significant change is marked as a red dot.

**c** Single-cell RNA-seq data from CeNGENApp<sup>39</sup> show *str-173* strong expression in ASK neurons and weak expression in OLQ neurons. The circle diameter represents the proportion of neurons in each cluster that express the *str-173* gene.

**d** Localization of *str-173* mutations in the gene.

Data information: Data are presented as median with interquartile range; significant p values ( $p < 0.05$ ) are in blue color; (a) two-tailed Mann-Whitney test. Source data are provided as a Source Data file.



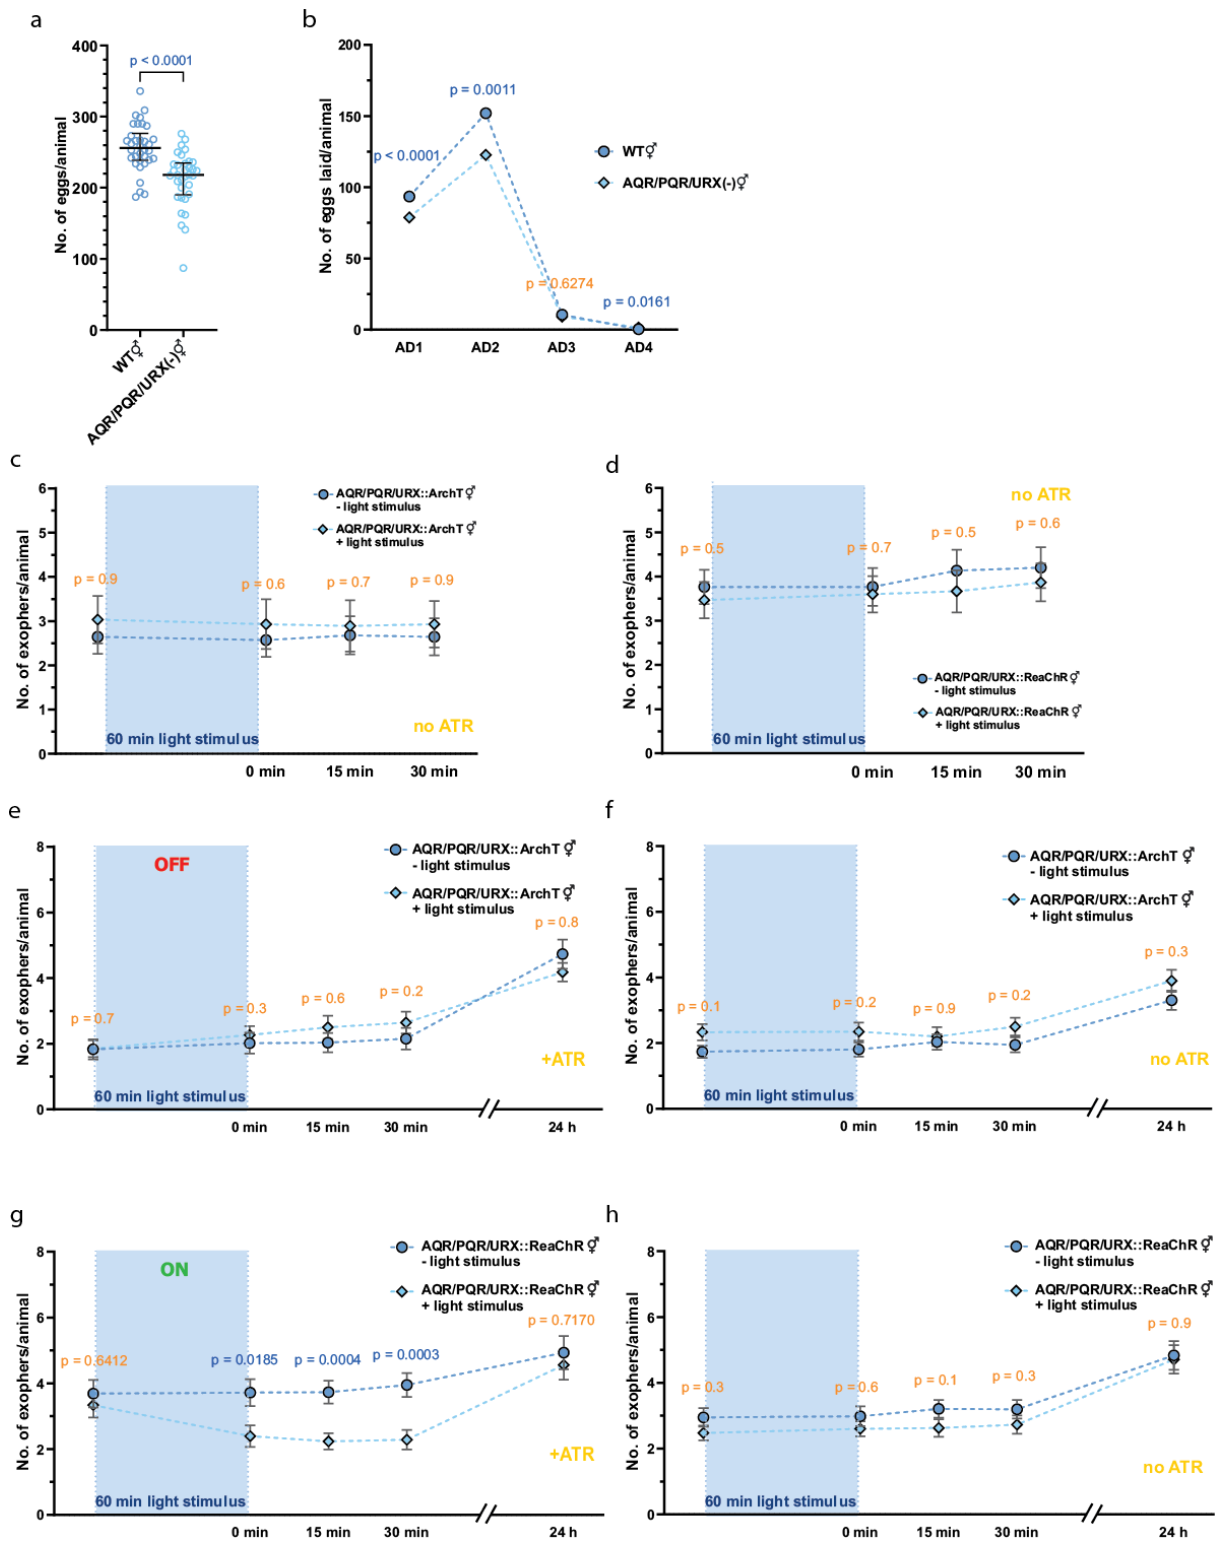

**Supplementary Figure 5. ReaChR-based activation but not ArchT-based inactivation at the adult day 1 (AD1) stage influences exopher production in hermaphrodites.**

**a - b** Worms with the genetic ablation of pseudocoelom-exposed AQR, PQR, and URX neurons have lower brood size than the wild type.  $n = 34$  worms,  $N = 3$  independent experiments.

**c - d** Control experiment without all-trans retinal (ATR) for ArchT-mediated inactivation and ReaChR-mediated activation of AQR, PQR, and URX neurons. (c)  $n = 23$  worms (-light stimulus), and 28 worms (+ light stimulus),  $N = 3$  independent experiments; (d)  $n = 30$  worms,  $N = 3$  independent experiments.

**e - f** ArchT-mediated inactivation of AQR, PQR, and URX neurons at the adult day 1 (AD1) stage does not modulate exopher production. (e)  $n = 59$  worms (-light stimulus), and 60 worms (+ light stimulus), (f)  $n = 57$  worms (-light stimulus), and 60 worms (+ light stimulus),  $N = 6$  independent experiments.

**g - h** ReaChR-mediated activation of AQR, PQR, and URX neurons at the adult day 1 (AD1) stage significantly decreases exopher production. (g)  $n = 61$  worms (-light stimulus), and 60 worms (+ light stimulus), (h)  $n = 62$  worms (-light stimulus), and 59 worms (+ light stimulus),  $N = 6$  independent experiments.

Data information: +ATR means “with all-trans-retinal”; no ATR means “without all-trans-retinal”. Data are presented as median with interquartile range (a), mean (b), or mean with SEM (c – h); not significant  $p$  values ( $p > 0.05$ ) are in orange color, significant  $p$  values ( $p < 0.05$ ) are in blue color; two-tailed Mann-Whitney test. Source data are provided as a Source Data file.

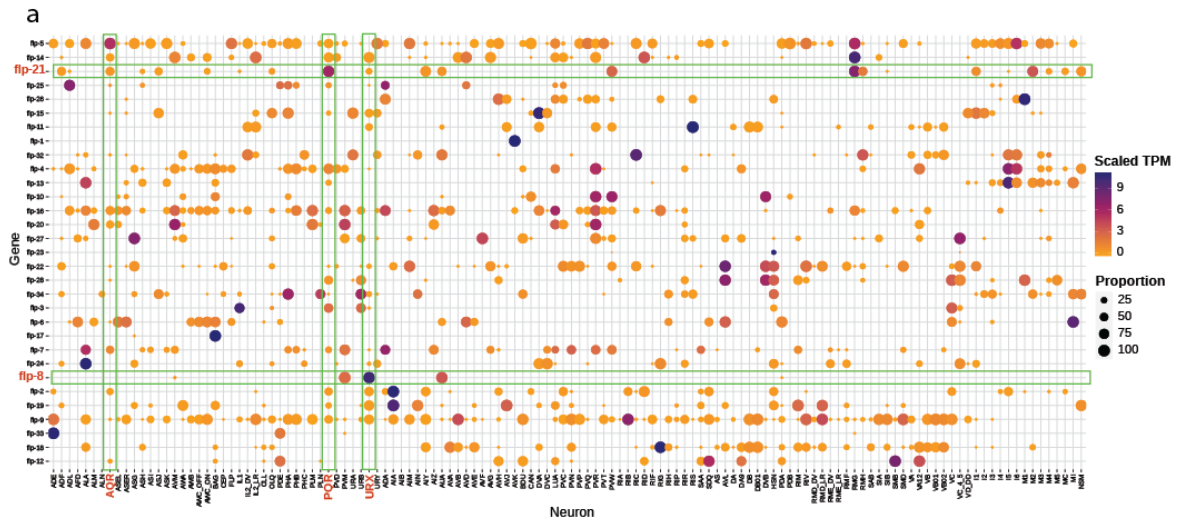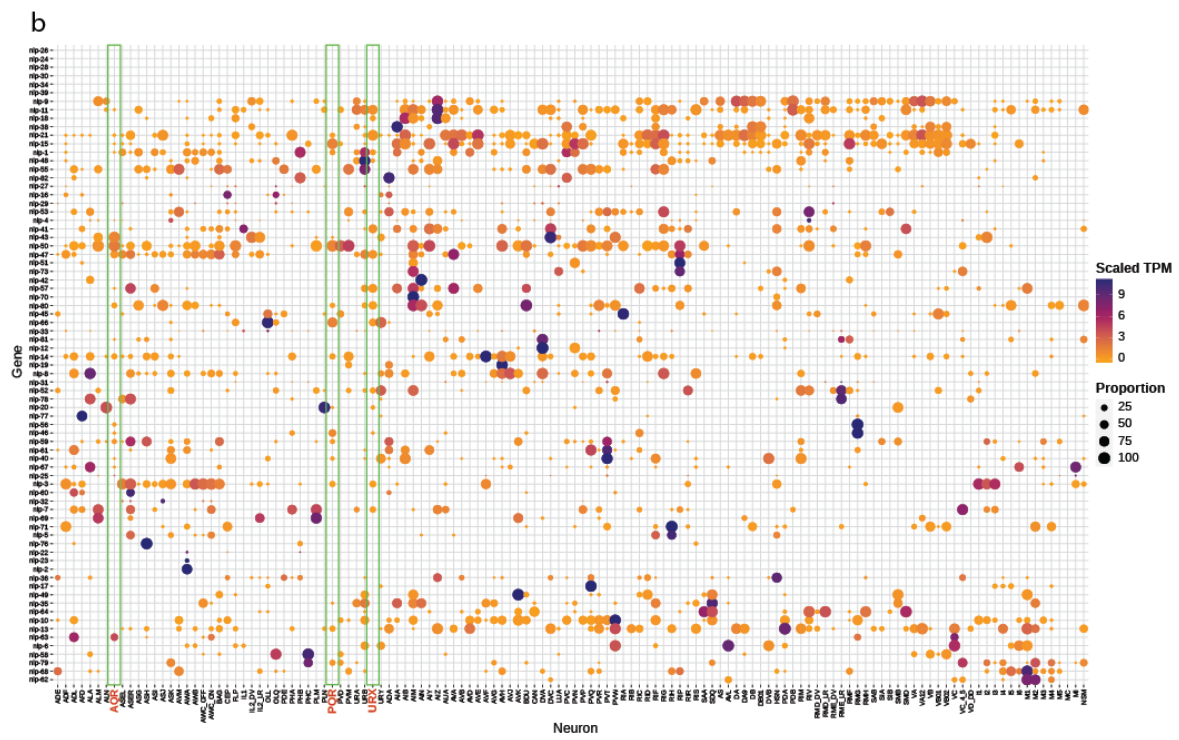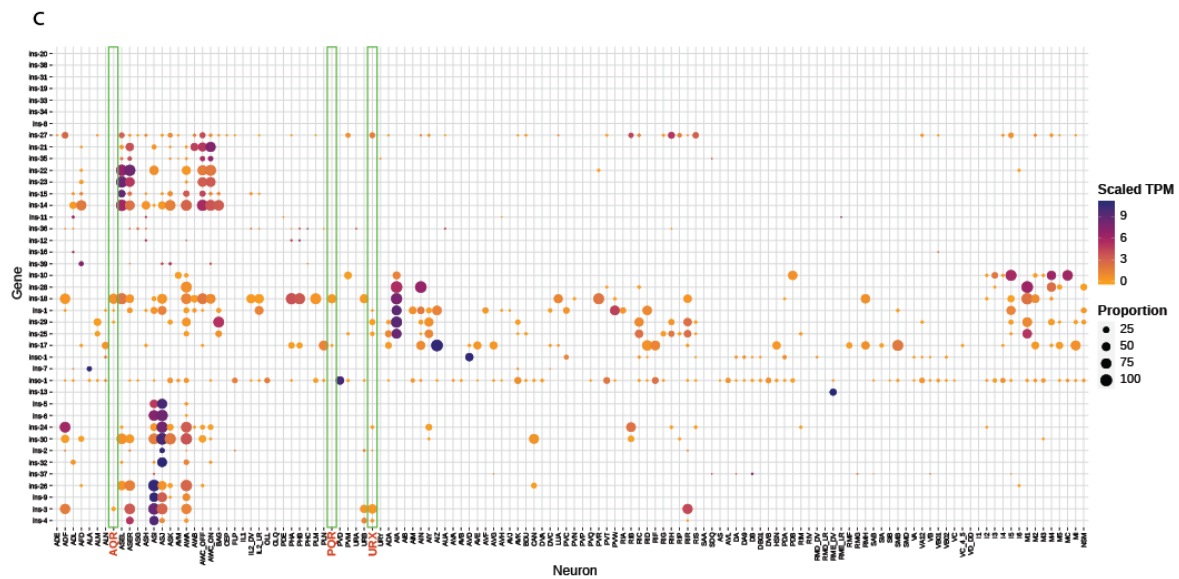

**Supplementary Figure 6. FLP-8 and FLP-21 are expressed in URX and AQR, PQR, URX, respectively.**

**a - c** *flp-8* and *flp-21* are strongly and relatively specifically expressed in AQR, PQR and/or URX neurons. Data taken from Taylor *et al.* (Taylor, S. R. et al. Molecular topography of an entire nervous system. Cell 184, 4329-4347.e23 (2021)) that were obtained for N2 wild-type worms at the L4 stage.

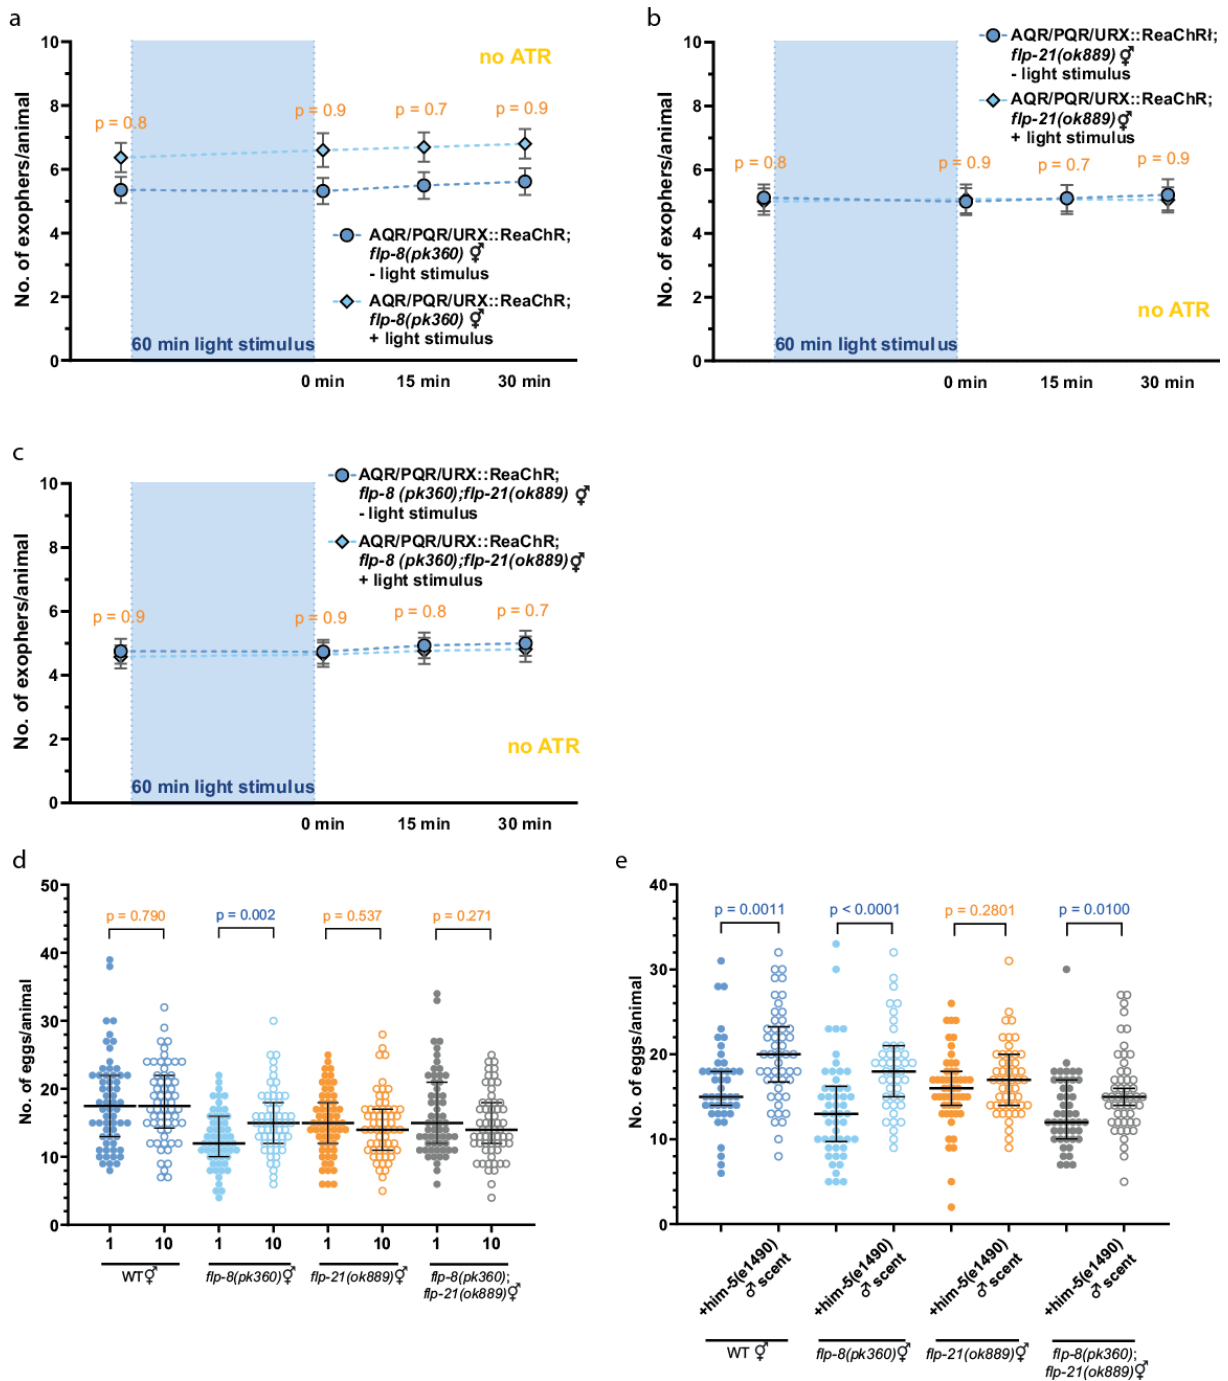

**Supplementary Figure 7. Control experiments without all-trans retinal (ATR) ReaChR-mediated activation of AQR, PQR, and URX neurons that do not produce FLP-8 and/or FLP-21 neuropeptides.**

**a** Control experiment without all-trans retinal (ATR) ReaChR-mediated activation of AQR, PQR, and URX neurons in *flp-8(pk360)* mutant background.  $n = 57$  worms (-light stimulus), and 58 worms (+ light stimulus),  $N = 5$  independent experiments.

**b** Control experiment without all-trans retinal (ATR) ReaChR-mediated activation of AQR, PQR, and URX neurons in *flp-21(ok889)* mutant background. n = 57 worms (-light stimulus), and 58 worms (+ light stimulus), N = 5 independent experiments.

**c** Control experiment without all-trans retinal (ATR) ReaChR-mediated activation of AQR, PQR, and URX neurons in *flp-8(pk360)*, *flp-21(ok889)* double mutant background.

n = 60 worms (-light stimulus), and 59 worms (+ light stimulus), N = 5 independent experiments.

**d** *In utero* embryo number for wild-type worms, *flp-8(pk360)* and *flp-21(ok889)* single and double mutants grown as solitary animals or in ten-hermaphrodite population. n = 60, 60, 55, 59, 60, 60, 59, and 60 worms (for respective columns), N = 3 independent experiments.

**e** *In utero* embryo number for wild-type worms, *flp-8(pk360)* and *flp-21(ok889)* single and double mutants grown on male-conditioned plates. n = 43, 50, 50, 43, 51, 50, 47, and 50 worms (for respective columns), N = 2 independent experiments.

Data information: +ATR means “with all-trans-retinal”; no ATR means “without all-trans-retinal”. Data are presented as mean with SEM (a - c) or as median with interquartile range (d - e); not significant p values ( $p > 0.05$ ) are in orange color, significant p values ( $p < 0.05$ ) are in blue color; two-tailed Mann-Whitney test. Source data are provided as a Source Data file.

## Supplementary Tables

**Supplementary Table 1. Differential expression analysis of detected GPCRs.** Bold font indicates the name of the transcript analyzed in detail in the manuscript. The two-sided Wald test was used to generate pvalues and log2FoldChanges. Padj represents the adjusted p-value using the Benjamini & Hochberg method.

| Gene.name             | log2FoldChange     | pvalue             | padj |
|-----------------------|--------------------|--------------------|------|
| <i>srw-86</i>         | 2.470005259        | 0.006089231        | NA   |
| <b><i>str-173</i></b> | <b>1.210254202</b> | <b>0.083872612</b> | NA   |
| <i>sri-39</i>         | 0.961870706        | 0.118312493        | NA   |
| <i>srm-1</i>          | 0.74631012         | 0.197705915        | NA   |
| <i>srh-269</i>        | 0.715357507        | 0.20128121         | NA   |
| <i>sri-36</i>         | 0.697436016        | 0.069365061        | NA   |
| <i>str-55</i>         | 0.69275127         | 0.286227955        | NA   |
| <i>srd-64</i>         | 0.671778641        | 0.227938718        | NA   |
| <i>srsx-36</i>        | 0.632246484        | 0.436691291        | NA   |
| <i>sri-57</i>         | 0.609273781        | 0.193809518        | NA   |
| <i>srw-89</i>         | 0.578848267        | 0.407242411        | NA   |
| <i>srbc-82</i>        | 0.56597091         | 0.423856002        | NA   |
| <i>srr-2</i>          | 0.523068614        | 0.103943944        | NA   |
| <i>srx-97</i>         | 0.505797282        | 0.424229255        | NA   |
| <i>sri-11</i>         | 0.489747472        | 0.297473585        | NA   |

|                |             |             |    |
|----------------|-------------|-------------|----|
| <i>srv-15</i>  | 0.463355568 | 0.372243301 | NA |
| <i>srj-14</i>  | 0.460503239 | 0.065003699 | NA |
| <i>sre-36</i>  | 0.458443613 | 0.346744567 | NA |
| <i>srh-217</i> | 0.429350684 | 0.444951979 | NA |
| <i>srh-2</i>   | 0.409544299 | 0.241263936 | NA |
| <i>srx-41</i>  | 0.39088958  | 0.531069383 | NA |
| <i>srr-10</i>  | 0.382508507 | 0.600239609 | NA |
| <i>srz-97</i>  | 0.370702424 | 0.498470233 | NA |
| <i>srsx-19</i> | 0.353102397 | 0.54270153  | NA |
| <i>srd-70</i>  | 0.320458039 | 0.541451057 | NA |
| <i>srh-71</i>  | 0.308999771 | 0.434944825 | NA |
| <i>str-179</i> | 0.291901118 | 0.596460956 | NA |
| <i>str-148</i> | 0.267146531 | 0.651806161 | NA |
| <i>sra-35</i>  | 0.258242663 | 0.576292957 | NA |
| <i>srx-45</i>  | 0.226491874 | 0.636877507 | NA |
| <i>srsx-27</i> | 0.225810039 | 0.724940673 | NA |
| <i>srr-6</i>   | 0.223992203 | 0.491120033 | NA |
| <i>srb-16</i>  | 0.213930895 | 0.686266407 | NA |
| <i>sri-55</i>  | 0.204504014 | 0.648957813 | NA |
| <i>srx-125</i> | 0.196087663 | 0.632165424 | NA |



|                |             |             |             |
|----------------|-------------|-------------|-------------|
| <i>srw-48</i>  | 0.1760458   | 0.784611201 | NA          |
| <i>sri-35</i>  | 0.174186697 | 0.816308334 | NA          |
| <i>srsx-25</i> | 0.172603337 | 0.699023544 | NA          |
| <i>srj-29</i>  | 0.145173827 | 0.82575966  | NA          |
| <i>str-176</i> | 0.145080793 | 0.381737839 | 0.705706926 |
| <i>srv-32</i>  | 0.140744356 | 0.836820773 | NA          |
| <i>srj-52</i>  | 0.12758145  | 0.8360209   | NA          |
| <i>srab-4</i>  | 0.123433522 | 0.75301419  | NA          |
| <i>srxa-14</i> | 0.122166676 | 0.825629763 | NA          |
| <i>src-1</i>   | 0.121226527 | 0.017785109 | 0.153059765 |
| <i>srr-4</i>   | 0.118248088 | 0.143496801 | 0.45832863  |
| <i>srsx-34</i> | 0.118146738 | 0.517657949 | NA          |
| <i>str-144</i> | 0.115566741 | 0.882522042 | NA          |
| <i>sri-8</i>   | 0.114856655 | 0.747072742 | NA          |
| <i>srh-48</i>  | 0.107505544 | 0.732564142 | NA          |
| <i>str-245</i> | 0.085385814 | 0.731316789 | NA          |
| <i>srv-7</i>   | 0.081868619 | 0.676931931 | NA          |
| <i>srj-9</i>   | 0.057842686 | 0.909552581 | NA          |
| <i>sra-33</i>  | 0.04490344  | 0.924342693 | NA          |
| <i>srsx-18</i> | 0.037063376 | 0.9551973   | NA          |

|                |              |             |             |
|----------------|--------------|-------------|-------------|
| <i>src-2</i>   | 0.006822308  | 0.971252278 | NA          |
| <i>srr-1</i>   | 0.00459541   | 0.99125387  | NA          |
| <i>sri-59</i>  | 0.000405882  | 0.999217048 | NA          |
| <i>srg-34</i>  | -0.030080578 | 0.947775572 | NA          |
| <i>str-172</i> | -0.085472421 | 0.87286706  | NA          |
| <i>srr-3</i>   | -0.088516378 | 0.76868265  | NA          |
| <i>srd-32</i>  | -0.107551827 | 0.816267341 | NA          |
| <i>srv-1</i>   | -0.11334895  | 0.410156047 | 0.727497177 |
| <i>srh-237</i> | -0.151085831 | 0.175026351 | 0.503664735 |
| <i>str-183</i> | -0.178110179 | 0.787945578 | NA          |
| <i>sra-10</i>  | -0.178642194 | 0.779315606 | NA          |
| <i>sra-32</i>  | -0.190091468 | 0.685526539 | NA          |
| <i>srd-14</i>  | -0.207486411 | 0.305360875 | NA          |
| <i>sre-13</i>  | -0.210537797 | 0.702655411 | NA          |
| <i>srd-52</i>  | -0.235477439 | 0.677464298 | NA          |
| <i>sri-40</i>  | -0.247157736 | 0.037111528 | 0.232197335 |
| <i>srz-85</i>  | -0.247831631 | 0.640803343 | NA          |
| <i>sra-14</i>  | -0.266593158 | 0.200655026 | NA          |
| <i>srh-16</i>  | -0.275054658 | 0.57204149  | NA          |
| <i>srh-70</i>  | -0.322126344 | 0.575669232 | NA          |

|                |              |             |    |
|----------------|--------------|-------------|----|
| <i>srab-14</i> | -0.328373116 | 0.605637275 | NA |
| <i>srx-12</i>  | -0.361291214 | 0.429781376 | NA |
| <i>sre-9</i>   | -0.397855081 | 0.275566108 | NA |
| <i>srx-58</i>  | -0.458521562 | 0.487282023 | NA |
| <i>sri-5</i>   | -0.458897325 | 0.308597251 | NA |
| <i>srt-23</i>  | -0.460153207 | 0.606235802 | NA |
| <i>srm-3</i>   | -0.470085367 | 0.174616055 | NA |
| <i>srh-33</i>  | -0.479357546 | 0.48607886  | NA |
| <i>srh-105</i> | -0.486191119 | 0.439431381 | NA |
| <i>srw-35</i>  | -0.492290252 | 0.480189518 | NA |
| <i>srx-118</i> | -0.521178132 | 0.380103143 | NA |
| <i>srm-5</i>   | -0.557246057 | 0.448970879 | NA |
| <i>srd-53</i>  | -0.588697815 | 0.325322641 | NA |
| <i>str-168</i> | -0.611511779 | 0.293797037 | NA |
| <i>sre-4</i>   | -0.659337898 | 0.279814818 | NA |
| <i>srx-98</i>  | -0.789769153 | 0.126804165 | NA |
| <i>srt-39</i>  | -0.803397597 | 0.204138417 | NA |
| <i>srz-99</i>  | -0.866876045 | 0.048915705 | NA |
| <i>sre-44</i>  | -1.105518367 | 0.091985454 | NA |

**Supplementary Table 2. List of all exopher-related phenotypes presented in the manuscript.**

| <b>Figure no.</b> | <b>Condition</b>                                                                                                     | <b>Observed phenotype</b>                                                                        |
|-------------------|----------------------------------------------------------------------------------------------------------------------|--------------------------------------------------------------------------------------------------|
| 1c                | Exopher level in hermaphrodites in the presence of <i>him-5(e1490)</i> males                                         | Increased exopher number in <i>him-5(e1490)</i> mutant hermaphrodites                            |
| 1d                | <i>In utero</i> embryo retention in the presence of <i>him-5(e1490)</i> males                                        | Increased embryo retention in <i>him-5(e1490)</i> mutant hermaphrodites                          |
| 1f                | Effect on exopher production in hermaphrodites grown on WT and <i>him-5</i> males-conditioned plates                 | Increased exopher number after exposure to <i>him-5</i> and WT males secretome                   |
| 1g                | Effect on <i>in utero</i> embryo retention in hermaphrodites grown on WT and <i>him-5</i> males-conditioned plates   | Increased <i>in utero</i> embryo retention after exposure to <i>him-5</i> and WT males secretome |
| 1i                | Effect of male pheromones presence on exopher production in different developmental time frames                      | Increased exopher number (strongest effect on exposure during L4 to AD1 stages)                  |
| 1j                | Effect of male pheromones presence on <i>in utero</i> embryo retention in different developmental time frames effect | Increased <i>in utero</i> embryo retention (apart from exposure during L4 to AD1 stages)         |
| 2b                | Population size effect on exopher production (single or 10 hermaphrodites)                                           | Single worms produce more exophers than worms cultured in 10 hermaphrodite population            |
| 2c                | Population size effect on <i>in utero</i> embryo retention                                                           | No effect                                                                                        |
| 2e                | Population size effect on exopher production (single, 5, or 10 hermaphrodites)                                       | Exopher number decreased in 5 and 10 hermaphrodites populations                                  |
| 2f                | Population size effect on exopher production (single, 10, or 100 hermaphrodites)                                     | Exopher number decreased in 10 and 100 hermaphrodite populations                                 |
| 2g                | Hermaphrodites-conditioned plates effect on exopher production                                                       | Hermaphrodite pheromones similarly decrease exopher number as hermaphrodite presence             |

|    |                                                                                                              |                                                                                                                                                                                                       |
|----|--------------------------------------------------------------------------------------------------------------|-------------------------------------------------------------------------------------------------------------------------------------------------------------------------------------------------------|
| 2h | Larvae presence effect on exopher production                                                                 | Larvae presence decreases exopher production                                                                                                                                                          |
| 3a | Effect of <i>ascr#3</i> exposure from L4 to AD2 on exophergenesis                                            | Decrease in exopher number after exposure to 1pg or 1ng of <i>ascr#3</i>                                                                                                                              |
| 3b | Effect of <i>ascr#3</i> exposure from embryo to AD2 on exophergenesis                                        | No effect                                                                                                                                                                                             |
| 3c | Effect of <i>ascr#10</i> exposure from L4 to AD2 on exophergenesis                                           | Dose-dependent effect– increase in exopher production after 1ng <i>ascr#10</i> exposure; exposure to 1 pg <i>ascr#10</i> has no effect                                                                |
| 3d | Effect of <i>ascr#10</i> exposure from embryo to AD2 on exophergenesis                                       | Dose-dependent effect– increase in exopher production after 1ng <i>ascr#10</i> exposure; exposure to 1 pg <i>ascr#10</i> has no effect                                                                |
| 3g | Influence of ascaroside side-chain biosynthesis mutants' presence on exophergenesis level in wild-type worms | Number of exophers elevated in the presence of <i>acox-1</i> mutants; decreased exopher level in the presence of <i>maoc-1</i> mutants; <i>daf-22</i> mutants presence does not affect exophergenesis |
| 3h | Influence of ascaroside side-chain biosynthesis mutants' presence on <i>in utero</i> embryo retention        | No influence                                                                                                                                                                                          |
| 4b | Influence of impaired ciliated sensory neurons on exophergenesis in <i>che-13</i> mutant                     | <i>che-13</i> mutant produces fewer exophers than wild-type worms                                                                                                                                     |
| 4c | Genetic ablation of chemosensory neurons effect on exopher production                                        | ASK(-), AWC(-), ADL(-), or ASH(-) mutants produce fewer exophers                                                                                                                                      |
| 4d | Genetic ablation of chemosensory neurons effect on <i>in utero</i> embryo retention                          | ASK(-), AWC(-), ADL(-), ASH(-) and CEM(+) have decreased <i>in utero</i> embryo retention                                                                                                             |
| 4e | Male-specific pheromones effect on exophergenesis in mutants with ablated chemosensory neurons               | ASK(-), ADL(-), AWB(-) – no effect<br>WT, AWC(-), ASH(-), ASI(-), CEM(+) – increased exophergenesis after male pheromones exposure                                                                    |
| 4f | Population size effect on exopher production in mutants with ablated chemosensory neurons                    | ASH(-), ASI(-), CEM(-), ASK(-) – no effect<br>AWC(-), ADL(-), AWB(-) – exopher number decreased in worms grown in the population of 10 hermaphrodites                                                 |

|    |                                                                                         |                                                                                                                                                                                                               |
|----|-----------------------------------------------------------------------------------------|---------------------------------------------------------------------------------------------------------------------------------------------------------------------------------------------------------------|
| 5a | <i>str-173</i> expression visualization in L1, L4 and AD2 worms                         | <i>str-173</i> is expressed in ASK neurons, vulva, and the tail in L4 and adult worms;<br>L1 larvae express <i>str-173</i> in pharynx                                                                         |
| 5b | <i>str-173</i> expression visualization in L4 worms                                     | <i>str-173</i> is expressed in ASK neurons                                                                                                                                                                    |
| 5c | Exopher level in <i>str-173</i> mutants                                                 | Exopher production is not altered in <i>str-173</i> mutants                                                                                                                                                   |
| 5d | Population size effect on exopher production in <i>str-173</i> mutants                  | <i>str-173(wwa1)</i> mutation does not affect exopher production in worms grown in separation or in 10 hermaphrodites population;<br><i>str-173(wwa2)</i> – higher exopher level in worms grown in separation |
| 5e | Male-specific pheromones effect on exopher production in <i>str-173</i> mutants         | No effect                                                                                                                                                                                                     |
| 5f | Effect of <i>ascr#10</i> exposure on exophergenesis in <i>str-173</i> mutants           | Decrease in exopher production                                                                                                                                                                                |
| 5g | Effect of <i>ascr#10</i> on eggs in utero retention in <i>str-173</i> mutants           | Decreased <i>in utero</i> embryo retention                                                                                                                                                                    |
| 5h | Effect of <i>ascr#10</i> exposure from embryo to AD2 on exophergenesis in ASK(-) mutant | No effect                                                                                                                                                                                                     |
| 5i | Effect of <i>ascr#3</i> exposure from embryo to AD2 on exophergenesis in ASK(-) mutant  | Decrease in exopher production                                                                                                                                                                                |
| 6a | Ablation of AQR/PQR/URX neurons effect on exopher level                                 | Increased exopher number in AQR/PQR/URX(-) mutant                                                                                                                                                             |
| 6b | Ablation of AQR/PQR/URX neurons affect <i>in utero</i> embryo retention                 | Decreased <i>in utero</i> embryo retention in AQR/PQR/URX(-) mutant                                                                                                                                           |
| 6c | ArchT-mediated AQR/PQR/URX inactivation effect on exopher production (AD2)              | Increased exopher number after AQR/PQR/URX inactivation                                                                                                                                                       |
| 6d | ReaChR-mediated AQR/PQR/URX activation effect on exopher production (AD2)               | Decreased exopher number after AQR/PQR/URX activation                                                                                                                                                         |

|    |                                                                                                               |                                                                                                                                                                                                                                  |
|----|---------------------------------------------------------------------------------------------------------------|----------------------------------------------------------------------------------------------------------------------------------------------------------------------------------------------------------------------------------|
| 6e | Ablation of ASK/AQR/PQR/URX neurons effect on exopher level                                                   | Low exophergenesis levels in animals with genetic ablation of ASK neurons and high levels of exophergenesis in animals with genetic ablation of AQR, PQR, and URX neurons are equalized in animals with all four neurons removed |
| 6f | Population size effect on exopher production in AQR/PQR/URX(-) mutant                                         | No effect                                                                                                                                                                                                                        |
| 6g | Male-specific pheromones effect on exopher production in AQR/PQR/URX(-) mutant                                | Increase in exopher production after exposure to male secretome                                                                                                                                                                  |
| 6h | FUdR effect on exophergenesis in AQR/PQR/URX(-) mutant                                                        | Decreased exopher production in animals treated with FUdR is not rescued by AQR/PQR/URX removal                                                                                                                                  |
| 6i | <i>rme-2</i> knockdown effect on exophergenesis in AQR/PQR/URX(-) mutant                                      | AQR/PQR/URX removal only partially rescues the inhibition of exophergenesis caused by <i>rme-2</i> knockdown                                                                                                                     |
| 7a | Exopher level in <i>flp-8(pk360)</i> and <i>flp-21(ok889)</i> mutants                                         | Increased exopher production in single <i>flp-8</i> and <i>flp-21</i> mutants, and in <i>flp-8; flp-21</i> double mutant                                                                                                         |
| 7b | Number of <i>in utero</i> embryos in <i>flp-8(pk360)</i> and <i>flp-21(ok889)</i> mutants                     | No change                                                                                                                                                                                                                        |
| 7c | ReaChR-mediated AQR/PQR/URX; <i>flp-8(pk360)</i> activation effect on exopher production (AD2)                | Increased exopher production                                                                                                                                                                                                     |
| 7d | ReaChR-mediated AQR/PQR/URX; <i>flp-21(ok889)</i> activation effect on exopher production (AD2)               | No effect                                                                                                                                                                                                                        |
| 7e | ReaChR-mediated AQR/PQR/URX; <i>flp-8(pk360); flp-21(ok889)</i> activation effect on exopher production (AD2) | No effect                                                                                                                                                                                                                        |
| 7f | Population size effect on exopher production in <i>flp-8(pk360)</i> , <i>flp-</i>                             | No effect                                                                                                                                                                                                                        |

|              |                                                                                                                                                     |                                                                                                                              |
|--------------|-----------------------------------------------------------------------------------------------------------------------------------------------------|------------------------------------------------------------------------------------------------------------------------------|
|              | <i>21(ok889)</i> , and <i>flp-8(pk360)/flp-21(ok889)</i> mutants                                                                                    |                                                                                                                              |
| 7g           | Male-specific pheromones effect on exopher production in <i>flp-8(pk360)</i> , <i>flp-21(ok889)</i> , and <i>flp-8(pk360)/flp-21(ok889)</i> mutants | Increased exopher production                                                                                                 |
| Sup. Fig. 1a | Males-conditioned plates seeded with HT115 bacteria strain effect on exopher production                                                             | Increase in exopher production                                                                                               |
| Sup. Fig. 1c | <i>him-5</i> males secretions effect on <i>him-5</i> hermaphrodites' exopher production                                                             | No effect                                                                                                                    |
| Sup. Fig. 1d | Co-culturing <i>him-5</i> hermaphrodites with <i>him-5</i> males                                                                                    | Increased exopher production                                                                                                 |
| Sup. Fig. 2a | Effect of <i>ascr#3</i> on <i>in utero</i> embryo retention                                                                                         | No effect                                                                                                                    |
| Sup. Fig. 2b | Effect of <i>ascr#10</i> on <i>in utero</i> embryo retention                                                                                        | No effect                                                                                                                    |
| Sup. Fig. 3a | Influence of single neuron class removal on exopher production in solitary animals                                                                  | ASK(-), AWC(-), ADL(-), ASH(-), CEM(+) – decreased exopher production<br>AWB(-), ASI(-) – no change                          |
| Sup. Fig. 3b | Influence of AWC neuron absence on exophergenesis in different temperatures                                                                         | AWC neurons regulate the temperature-dependent increase in muscle exopher production                                         |
| Sup. Fig. 3c | Male-specific pheromones effect on egg retention in mutants with ablated chemosensory neurons                                                       | ASI(-) – increased number of <i>in utero</i> embryos after exposure to male pheromones<br>ASK(-), ADL(-), AWB(-) – no change |
| Sup. Fig. 3d | Population size effect on <i>in utero</i> embryos retention in mutants with ablated chemosensory neurons                                            | ASI(-) -more embryos retained in worms grown in the population of 10 hermaphrodites<br>AWB(-) – no change                    |
| Sup. Fig. 3e | Influence of ascaroside side-chain biosynthesis mutants presence on exophergenesis level in ASI(-) mutants                                          | No influence                                                                                                                 |



|                 |                                                                                                            |                                                                                                         |
|-----------------|------------------------------------------------------------------------------------------------------------|---------------------------------------------------------------------------------------------------------|
| Sup.<br>Fig. 3f | Influence of ascaroside side-chain biosynthesis mutants presence on exophergenesis level in AWB(-) mutants | No influence                                                                                            |
| Sup.<br>Fig. 4a | Population size effect on the number of exophers produced by worms that were used for RNAseq analysis      | Worms cultured in a population of 10 hermaphrodites – fewer exophers produced in each biological repeat |
| Sup.<br>Fig. 5a | Number of eggs laid by AQR/PQR/URX(-) mutant                                                               | Decreased number of laid eggs by AQR/PQR/URX(-) mutant                                                  |
| Sup.<br>Fig. 5b | Number of eggs laid by AQR/PQR/URX(-) mutant on consecutive days of adulthood                              | No significant change                                                                                   |
| Sup.<br>Fig. 5c | ArchT-mediated AQR/PQR/URX inactivation effect on exopher production (no ATR control)                      | No change                                                                                               |
| Sup.<br>Fig. 5d | ReaChR-mediated AQR/PQR/URX activation effect on exopher production (no ATR control)                       | No change                                                                                               |
| Sup.<br>Fig. 5e | ArchT-mediated AQR/PQR/URX inactivation effect on exopher production (AD1)                                 | No change                                                                                               |
| Sup.<br>Fig. 5f | ArchT-mediated AQR/PQR/URX inactivation effect on exopher production (no ATR control; AD1)                 | No change                                                                                               |
| Sup.<br>Fig. 5g | ReaChR-mediated AQR/PQR/URX activation effect on exopher production (AD1)                                  | Decrease in exopher production after 30 min light stimulation                                           |
| Sup.<br>Fig. 5h | ReaChR-mediated AQR/PQR/URX activation effect on exopher production (no ATR control, AD1)                  | No change                                                                                               |
| Sup.<br>Fig. 7a | ReaChR-mediated AQR/PQR/URX; <i>flp-8(pk360)</i> activation effect on exopher production (no ATR control)  | No change                                                                                               |

|                 |                                                                                                                                                                                                                   |                                                                                                   |
|-----------------|-------------------------------------------------------------------------------------------------------------------------------------------------------------------------------------------------------------------|---------------------------------------------------------------------------------------------------|
| Sup.<br>Fig. 7b | ReaChR-mediated AQR/PQR/URX;<br><i>flp-21(ok889)</i> activation effect on<br>exopher production (no ATR control)                                                                                                  | No change                                                                                         |
| Sup.<br>Fig. 7c | ReaChR-mediated AQR/PQR/URX;<br><i>flp-8(pk360); flp-21(ok889)</i><br>activation effect on exopher<br>production (no ATR control)                                                                                 | No change                                                                                         |
| Sup.<br>Fig. 7d | Population size effect on <i>in utero</i><br>embryos retention in <i>flp-8(pk360)</i> ,<br><i>flp-21(ok889)</i> , and <i>flp-8(pk360)/flp-21(ok889)</i> mutants                                                   | <i>flp-21, flp-8/flp-21</i> – no effect<br><i>flp-8</i> – increased in utero embryos retention    |
| Sup.<br>Fig. 7e | Effect on <i>in utero</i> embryo retention<br>in <i>flp-8(pk360)</i> , <i>flp-21(ok889)</i> , and<br><i>flp-8(pk360)/flp-21(ok889)</i> mutant<br>hermaphrodites grown on <i>him-5</i><br>males-conditioned plates | <i>flp-8, flp-8/flp-21</i> – increased in utero embryos<br>retention<br><i>flp-21</i> – no change |

## Description of Supplementary Data Files

### File name: Supplementary Data 1

**Description:** List of reagents and software used in the study.

### File name: Supplementary Data 2

**Description:** List of *Caenorhabditis elegans* strains used in the study.

### File name: Supplementary Data 3

**Description:** List of recombinant DNA and oligonucleotides used in the study.
