# Supplementary material for: Pheromone-based communication influences the production of somatic extracellular vesicles in C. elegans
Source: PubMed Central journal article supplement (PMC10978837; doi:10.1038/s41467-024-47016-x), 2024-03-28
Supplement: 41467_2024_47016_MOESM3_ESM.pdf [file 41467_2024_47016_MOESM3_ESM.pdf]

## **Description of Additional Supplementary Files**

### **File name: Supplementary Data 1**

**Description:** List of reagents and software used in the study.

### **File name: Supplementary Data 2**

**Description:** List of *Caenorhabditis elegans* strains used in the study.

### **File name: Supplementary Data 3**

**Description:** List of recombinant DNA and oligonucleotides used in the study.
